# Supplementary material
Source: HighWire-hosted journal article supplement (https://bmjopen.bmj.com/content/10/10/e037408)
Supplement: inline-supplementary-material-1 [file inline-supplementary-material-1.pdf]

**Supplemental information:** Dengue-related knowledge, attitudes and practices in Villa el Salvador, Lima, Peru

**S1:** Interesting themes noted in open-ended questions answers

| Knowledge    |                                                                                                                                                                                                                                                                                                                                                                                                                                                                                                                                                                                                                                                                                                                                                                                              |
|--------------|----------------------------------------------------------------------------------------------------------------------------------------------------------------------------------------------------------------------------------------------------------------------------------------------------------------------------------------------------------------------------------------------------------------------------------------------------------------------------------------------------------------------------------------------------------------------------------------------------------------------------------------------------------------------------------------------------------------------------------------------------------------------------------------------|
| Transmission | <p><i>"Pone el huevo en el agua y si tomas nos contaminamos con el dengue"</i> (Drinking water with eggs)<br/>Dengue transmission through ingestion of insect eggs was a common theme</p> <p><i>"Por tener mucho tiempo agua en el florero"</i> (Keeping water in the flower vases for too long)<br/>Transmission of dengue from uncovered water sources was also commonly recorded.</p> <p><i>"Por las aguas depositadas y estancadas"</i> (From collected and stagnant waters)<br/>This is another example of the belief dengue comes from infected waters. The connection between dengue and water may come from the current MINSA practices, where individuals are making the association between water sources and illness, but do not grasp that mosquitoes tie them together yet.</p> |
| Treatment    | <p><i>"Vacunarse"</i> (Vaccination)<br/>A handful of individuals stated vaccines and injections as a way to treat dengue. There might have been some miscommunication for them to include it as a treatment and not a form of prevention.</p> <p><i>"Tomar agua de coco sal de Andrew sal de fruta ENO"</i> (Drink coconut water, Andrews salt, and ENO fruit salt)<br/>Many individuals knew to take supplements for rehydration as a way to treat dengue symptoms, and it is common in Peru to drink coconut water as a form of rehydration.</p>                                                                                                                                                                                                                                           |
| Practices    |                                                                                                                                                                                                                                                                                                                                                                                                                                                                                                                                                                                                                                                                                                                                                                                              |
| Prevention   | <p><i>"Cambiar el agua de los floreros"</i> (Change the flower vase water)<br/>Many answers included getting rid of old sources of water and keeping water covered.</p> <p><i>"No tener agua acumulada tomar agua hervida"</i> (Don't let water accumulate and drink boiled water)<br/>A common theme for dengue prevention was to cover water, which ties back to the belief that dengue is from contaminated waters.</p> <p><i>"Las enfermeras de las postas les dan unos sobres para echar al tacho"</i> (The nurses at the health clinic handout)</p>                                                                                                                                                                                                                                    |
| Reduce       | <p><i>"Quema hojas de eucalipto y los matas con la mano"</i> (Burn eucalyptus sticks and swat them with your hand)<br/>Many individuals stated they burn eucalyptus as a way to reduce the number of mosquitoes in their household and included it in their list of products used for mosquito control.</p>                                                                                                                                                                                                                                                                                                                                                                                                                                                                                  |
